1 **Fragmented QRS is independently predictive of long-term adverse clinical**  
2 **outcomes in Asian patients hospitalized for heart failure: a retrospective**  
3 **cohort study**

4 Running head: Fragmented QRS in Asian HF patients

5 Dr Jeffrey Shi Kai Chan, MBChB<sup>1</sup>, Mr Jiandong Zhou<sup>2</sup>, Ms Sharen Lee<sup>1</sup>, Mr Andrew Li<sup>3</sup>, Mr  
6 Martin Tan<sup>4</sup>, Mr Keith SK Leung, BSc<sup>5</sup>, Prof Kamalan Jeevaratnam, PhD<sup>6</sup>, Prof Tong Liu,  
7 MD, PhD<sup>7</sup>, Prof Ying Liu, MD, PhD<sup>8</sup>, Prof Qingpeng Zhang PhD<sup>2</sup>, Prof Gary TSE, PhD,  
8 FRCP<sup>1,6,7#</sup>

9 <sup>1</sup> Cardiovascular Analytics Group, Laboratory of Cardiovascular Physiology, Hong Kong,  
10 China

11 <sup>2</sup> School of Data Science, City University of Hong Kong, Hong Kong, China

12 <sup>3</sup> Faculty of Science, University of Calgary, Calgary, Canada

13 <sup>4</sup> University of Toronto, Toronto, Canada

14 <sup>5</sup> Emergency Medicine Unit, Li Ka Shing Faculty of Medicine, The University of Hong  
15 Kong, Hong Kong, China

16 <sup>6</sup> Faculty of Health and Medical Sciences, University of Surrey, Guildford, United Kingdom

17 <sup>7</sup> Tianjin Key Laboratory of Ionic-Molecular Function of Cardiovascular Disease,  
18 Department of Cardiology, Tianjin Institute of Cardiology, Second Hospital of Tianjin  
19 Medical University, Tianjin 300211, China

20 <sup>8</sup> Heart Failure and Structural Cardiology Division, The First Affiliated Hospital of Dalian  
21 Medical University, Dalian, Liaoning Province, 116021, China

22

23 # Correspondence to:

24 Prof. Gary Tse PhD FRCP

25 Tianjin Key Laboratory of Ionic-Molecular Function of Cardiovascular Disease, Department  
26 of Cardiology, Tianjin Institute of Cardiology, Second Hospital of Tianjin Medical  
27 University, Tianjin 300211, China

28 Faculty of Health and Medical Sciences, University of Surrey, GU2 7AL, Guildford, United  
29 Kingdom

30 Email: [g.tse@surrey.ac.uk](mailto:g.tse@surrey.ac.uk)

31 Tel.: +86-22-88328617

32 Fax: +86-22-28261158

33

34

NOTE: This preprint reports new research that has not been certified by peer review and should not be used to guide clinical practice.

1    **Abstract**

2    Fragmented QRS (fQRS) results from myocardial scarring and predicts cardiovascular  
3    mortality and ventricular arrhythmia. In this retrospective cohort study, we evaluated the  
4    prevalence and prognostic value of fQRS in patients hospitalized for heart failure between 1<sup>st</sup>  
5    January 2010 and 31<sup>st</sup> December 2016 at a tertiary center in Hong Kong. We found fQRS to  
6    be an independent predictor of adverse clinical outcomes, with higher risks in those with  
7    higher fQRS burden.

8

9    **Keywords:** fragmented QRS, heart failure, Asian, ventricular arrhythmia, sudden cardiac  
10   death, myocardial fibrosis

1 Fragmented QRS (fQRS) is the manifestation of myocardial scarring on 12-lead surface  
2 electrocardiogram (ECG).(1,2) Though initially described in the context of ischaemic heart  
3 disease (IHD), fQRS has been observed in other conditions where myocardial scarring or  
4 fibrosis is present.(2,3) While fQRS has been shown to predict adverse outcomes in patients  
5 with heart failure,(4) most studies have focused on either acute outcomes of hospitalized  
6 patients, or long-term outcomes of ambulatory patients.(5,6) Data on the long-term  
7 prognostic power of fQRS in patients hospitalized with heart failure are lacking. Also, with  
8 the rising prevalence of heart failure in Asia,(7,8) there is an urgent need for good prognostic  
9 markers in Asian patients with heart failure. We aimed to bridge these gaps in evidence with  
10 the current study.

11

12 This was a retrospective cohort study approved by The Joint Chinese University of Hong  
13 Kong - New Territories East Cluster Clinical Research Ethics Committee. All patients aged  
14 18 years old or above who were hospitalized for heart failure between 1<sup>st</sup> January 2010 and  
15 31<sup>st</sup> December 2016 at a single tertiary center in Hong Kong were included. Patients who had  
16 wide QRS ( $\geq 120$  ms), missing primary outcome data, and those who did not have any ECG  
17 done during the index hospitalization were excluded. The patients were identified using the  
18 Clinical Data Analysis and Reporting System (CDARS), a territory-wide database that  
19 centralizes patient information from local hospitals and ambulatory and outpatient facilities.  
20 Mortality data were obtained from the Hong Kong Death Registry, a government registry  
21 with the registered death records of all Hong Kong citizens linked to CDARS.

22 Patient demographics, prior comorbidities, and baseline medication usage were extracted.

23 The baseline ECG obtained on the first heart failure admission was selected for analysis. We  
24 defined fQRS using the criteria set forth by Das et al, where fQRS was defined as the

1 presence of an additional R wave (R'), notching in the nadir of the S wave, or presence of  
2 more than two R' waves in at least two contiguous leads within any myocardial territory  
3 (anterior, inferior, or lateral) with QRS duration of <120 ms.(9) QRS complexes with  
4 fragmented morphology in a single lead were not classified as fQRS. The primary outcome  
5 was a composite of cardiovascular mortality, VA, and SCD. The secondary outcomes were  
6 the individual components of the primary composite outcome, myocardial infarction (MI),  
7 and new-onset atrial fibrillation (AF). All patients were followed up till 31<sup>st</sup> December 2019.

8

9 All continuous variables were expressed as mean  $\pm$  standard deviation and compared using  
10 Student's t test. Dichotomous variables were compared using Fisher's exact test. All  
11 outcomes were analyzed by univariate Cox regression and multivariate Cox regression  
12 adjusting for baseline comorbidities that were significantly different between cohorts; hazard  
13 ratios (HR) were used as the summary statistic. Subgroup analyses were done to assess the  
14 prognostic power of fQRS in patients with and without ischaemic heart disease respectively,  
15 as well as the impact of fQRS burden in patients with fQRS. All p values were two-sided, and  
16  $p < 0.05$  was considered significant. All statistical analyses were performed using SPSS  
17 software version 25.0 (IBM Corp, New York, USA).

18

19 In total, 2868 patients fulfilled the inclusion criteria. After excluding patients with missing  
20 ECG (N=2), missing primary outcome data (N=309), and wide QRS complex (N=373), 2182  
21 patients were included in the analysis. We identified fQRS in 179 patients (8.20%), more of  
22 whom were males than those without fQRS (54.7% vs 46.6%,  $p=0.042$ ), but were not  
23 significantly different in age ( $75.4 \pm 14.8$  years vs  $74.4 \pm 13.5$  years,  $p=0.403$ ). Patients with  
24 fQRS had significantly higher rates of renal diseases ( $p=0.011$ ). Other baseline characteristics

1 were not significantly different between the two cohorts (Table 1). Follow-up durations were  
2 similar between the two cohorts ( $5.53\pm 4.21$  years vs  $5.64\pm 4.08$  years,  $p=0.733$ ). The primary  
3 composite outcome was met in 566 (25.9%) patients, while the secondary outcome of  
4 cardiovascular mortality was met in 419 (19.2%) patients, VA in 56 (2.6%) patients, SCD in  
5 212 (9.7%) patients, MI in 353 (16.2%) patients, and new-onset AF in 829 (38.0%) patients.

6  
7 Cox regression (Table 2) showed that the presence of fQRS predicted the primary composite  
8 outcome in univariate analysis (HR 1.507 [1.160, 1.959],  $p=0.002$ ), which remained  
9 significant after adjustments for baseline differences (HR 1.541 [1.185, 2.004],  $p=0.001$ ;  
10 Figure 1A). Both univariate and multivariate analyses also demonstrated that fQRS was  
11 strongly predictive of cardiovascular mortality, VA, and SCD. However, there were no  
12 significant differences in the risks of MI and new-onset AF. To delineate the prognostic value  
13 of fQRS more clearly, we further adjusted the above multivariate analyses with clinical  
14 history of VA. The statistical significance of all these observations remained stable after  
15 adjustment, showing that the prognostic value of fQRS was independent of clinical history of  
16 VA.

17  
18 Subgroup analysis was performed on patients with (786 (36.0%)) and without (1396 (64.0%))  
19 IHD. fQRS was present in 75 (9.5%) patients with IHD, and 104 (7.4%) patients without  
20 IHD. Patients with IHD were follow-up for slightly longer periods ( $5.82\pm 4.13$  years vs  
21  $5.29\pm 4.00$  years,  $p=0.003$ ). Among patients with IHD, the primary composite outcome was  
22 met in 228 (29.0%) patients, while the outcome of cardiovascular mortality was met in 171  
23 (21.8%) patients, VA in 28 (3.6%) patients, SCD in 83 (10.6%) patients, MI in 204 (26.0%)  
24 patients, and new-onset AF in 249 (31.7%) patients. Among patients without IHD, these were

1 met in 338 (24.2%), 248 (17.8%), 28 (2.0%), 129 (9.2%), 149 (10.7%), and 580 (41.5%)  
2 patients, respectively. Cox regression (Supplementary Table S1) showed that in patients with  
3 IHD, fQRS predicted the primary composite outcome (adjusted HR 1.746 [1.191, 2.559],  
4  $p=0.004$ ), cardiovascular mortality, VA, and SCD. However, fQRS did not predict the  
5 primary composite outcome in patients without IHD (adjusted HR 1.342 [0.929, 1.938],  
6  $p=0.117$ ), despite remaining strongly predictive of VA and SCD.

7  
8 Patients with fQRS were stratified into those who had two contiguous leads with fQRS (112  
9 patients; 5.13% of all patients; 62.6% of patients with fQRS), and those who had more than  
10 two such leads (67 patients; 3.07% of all patients; 37.4% of patients with fQRS). The two  
11 subgroups were not significantly different in any baseline characteristics. Cox regression  
12 (Supplementary Table S2) demonstrated significantly higher risk of the primary composite  
13 outcome in the latter (HR 1.841 [1.119, 3.029],  $p=0.016$ ; Figure 1B), driven by a significantly  
14 higher risk of SCD (HR 2.866 [1.350, 6.081],  $p=0.006$ ) which remained significant even after  
15 adjustment for clinical history of VA and SCD (HR 2.679 [1.252, 5.729],  $p=0.011$ ). All other  
16 outcomes were not significantly different in risk between the two subgroups.

17  
18 To the authors' best knowledge, this is the first study focusing on Asian patients hospitalized  
19 with heart failure that reported long-term clinical outcomes, with a mean follow-up duration  
20 exceeding five years. We confirmed that the elevated risk of adverse outcomes in patients  
21 with fQRS persists in the long term, independent of prior history of VA. The magnitudes of  
22 elevated risk we observed were also comparable to previous studies.(4) Previous studies on  
23 Asian patients with heart failure have found fQRS in 16.6-49% of patients.(5,10,11) In  
24 contrast, we identified fQRS in 8.20% of included patients. This difference in prevalence was

1 probably due to the less-selective inclusion and exclusion criteria we used for the study  
2 population. Having identified all patients through a territory-wide database, the results of our  
3 study more closely reflect real life practice, and better guide clinicians in their care of patients  
4 with heart failure. Additionally, we found that a higher burden of fQRS was associated with  
5 further increased risk of SCD. This finding may be due to higher fQRS burden reflecting  
6 more extensive myocardial scarring.(12) The cutoff of two contiguous leads with fQRS  
7 meant that the presence of additional leads with QRS complexes of fragmented morphology  
8 beyond the classification criteria would be additionally predictive of SCD, allowing for  
9 intuitive interpretation and facilitating clinical applications.

10

11 Importantly and interestingly, we showed that fQRS was predictive of SCD but not  
12 cardiovascular mortality in patients without IHD. It must be noted that non-ischaemic  
13 cardiomyopathies are a heterogeneous entity with various aetiologies. It is possible that fQRS  
14 has varying significance in these patients depending on the aetiology of cardiomyopathy.  
15 Further studies are warranted in this area.

16

17 This study has several limitations. First, data obtained from CDARS could not be  
18 adjudicated. However, all data entry were done by clinicians who had no involvement in this  
19 study. Second, without accompanying echocardiographic and aetiological data, the included  
20 patients with heart failure were heterogeneous in aetiology and phenotype. As shown by the  
21 subgroup analysis on patients with or without IHD, such differences may affect the  
22 prognostic value of fQRS. Third, our analysis did not account for differences in the  
23 morphologies of fQRS, which may have prognostic implications.(2)

24

1 In conclusion, fQRS was strongly and independently predictive of cardiovascular mortality,  
2 VA, and SCD in Asian patients hospitalized for heart failure. Having fQRS in more than two  
3 contiguous leads independently predicted further increased risk of SCD. However, fQRS did  
4 not predict cardiovascular mortality in patients without IHD, warranting further studies.

5

6 The authors wish to declare no conflict of interest. No funding was obtained for this study.

7

## 8 **Supplementary materials**

9 Supplementary Table S1. Cox regression results, stratified by the presence of ischaemic heart  
10 disease. Hazard ratios (HR) were referenced against patients without fragmented QRS.

11 Supplementary Table S2. Cox regression of the 179 patients with fragmented QRS. Hazard  
12 ratios were referenced against patients with fragmented QRS present in only two contiguous  
13 leads.

14 STROBE checklist

15



## 1   **References**

- 2   1.   Boineau JP, Cox JL. Slow ventricular activation in acute myocardial infarction. A  
3       source of re entrant premature ventricular contractions. *Circulation*. 1973;48(4):702–  
4       13.
- 5   2.   Haukilahti MAE, Eranti A, Kenttä T, Huikuri H V. QRS fragmentation patterns  
6       representing myocardial scar need to be separated from benign normal variants:  
7       Hypotheses and proposal for morphology based classification. *Front Physiol*. 2016 Dec  
8       26;7(DEC):653.
- 9   3.   Homsy M, Alsayed L, Safadi B, Mahenthiran J, Das MK. Fragmented QRS complexes  
10      on 12-lead ECG: A marker of cardiac sarcoidosis as detected by gadolinium cardiac  
11      magnetic resonance imaging. *Ann Noninvasive Electrocardiol*. 2009;14(4):319–26.
- 12  4.   Kanitsoraphan C, Rattanawong P, Mekraksakit P, Chongsathidkiet P, Riangwiwat T,  
13      Kanjanahattakij N, et al. Baseline fragmented QRS is associated with increased all-  
14      cause mortality in heart failure with reduced ejection fraction: A systematic review and  
15      meta-analysis. *Ann Noninvasive Electrocardiol*. 2019 Mar 1;24(2).
- 16  5.   Pei J, Li N, Gao Y, Wang Z, Li X, Zhang Y, et al. The J wave and fragmented QRS  
17      complexes in inferior leads associated with sudden cardiac death in patients with  
18      chronic heart failure. *Europace*. 2012 Aug;14(8):1180–7.
- 19  6.   Younis AS, El-Halag MI, ElBadry MA, Abbas NIM. Fragmented QRS complex  
20      frequency and location as predictor of cardiogenic shock and mortality following acute  
21      coronary syndrome. *Egypt Hear J*. 2020 Dec 1;72(1).
- 22  7.   Rajadurai J, Tse HF, Wang CH, Yang NI, Zhou J, Sim D. Understanding the  
23      Epidemiology of Heart Failure to Improve Management Practices: An Asia-Pacific

- 1 Perspective. Vol. 23, Journal of Cardiac Failure. Churchill Livingstone Inc.; 2017. p.  
2 327–39.
- 3 8. Martinez-Amezcuca P, Haque W, Khera R, Kanaya AM, Sattar N, Lam CSP, et al. The  
4 upcoming epidemic of heart failure in South Asia. *Circulation: Heart Failure*.  
5 Lippincott Williams and Wilkins; 2020.
- 6 9. Das MK, Khan B, Jacob S, Kumar A, Mahenthiran J. Significance of a fragmented  
7 QRS complex versus a Q wave in patients with coronary artery disease. *Circulation*.  
8 2006 May;113(21):2495–501.
- 9 10. Igarashi M, Tada H, Yamasaki H, Kuroki K, Ishizu T, Seo Y, et al. Fragmented QRS  
10 Is a Novel Risk Factor for Ventricular Arrhythmic Events After Receiving Cardiac  
11 Resynchronization Therapy in Nonischemic Cardiomyopathy. *J Cardiovasc*  
12 *Electrophysiol*. 2017 Mar 1;28(3):327–35.
- 13 11. Sha J, Zhang S, Tang M, Chen K, Zhao X, Wang F. Fragmented QRS is associated  
14 with all-cause mortality and ventricular arrhythmias in patient with idiopathic dilated  
15 cardiomyopathy. *Ann Noninvasive Electrocardiol*. 2011 Jul;16(3):270–5.
- 16 12. Konno T, Hayashi K, Fujino N, Oka R, Nomura A, Nagata Y, et al.  
17 Electrocardiographic QRS Fragmentation as a Marker for Myocardial Fibrosis in  
18 Hypertrophic Cardiomyopathy. *J Cardiovasc Electrophysiol*. 2015 Oct 1;26(10):1081–  
19 7.
- 20  
21

1 **Table 1.** Baseline characteristics and follow-up durations of included patients.

|                                     | No fQRS<br>(N=2003) | fQRS present<br>(N=179) | p value |
|-------------------------------------|---------------------|-------------------------|---------|
| Follow-up duration, years           | 5.64±4.08           | 5.53±4.21               | 0.733   |
| <i>Demographics</i>                 |                     |                         |         |
| Male, N (%)                         | 934 (46.6)          | 98 (54.7)               | 0.042   |
| Age, years                          | 74.4±13.5           | 75.4±14.8               | 0.403   |
| <i>Comorbidities</i>                |                     |                         |         |
| Diabetes mellitus, N (%)            | 616 (30.8)          | 50 (27.9)               | 0.447   |
| Renal diseases, N (%)               | 277 (13.8)          | 13 (7.26)               | 0.011   |
| Hypertension, N (%)                 | 918 (45.8)          | 69 (38.5)               | 0.071   |
| Ischaemic heart disease, N (%)      | 711 (35.5)          | 75 (41.9)               | 0.089   |
| Myocardial infarction, N (%)        | 185 (9.2)           | 19 (10.6)               | 0.505   |
| Prior ventricular arrhythmia, N (%) | 21 (1.0)            | 5 (2.8)                 | 0.056   |
| Prior sudden cardiac death, N (%)   | 22 (1.1)            | 4 (2.2)                 | 0.159   |
| Atrial fibrillation, N (%)          | 370 (18.5)          | 41 (22.9)               | 0.162   |
| Stroke / TIA, N (%)                 | 264 (13.2)          | 18 (10.1)               | 0.294   |
| <i>Medications</i>                  |                     |                         |         |
| ACEI / ARB, N (%)                   | 1016 (50.7)         | 95 (53.1)               | 0.585   |
| Calcium channel blockers, N (%)     | 923 (46.1)          | 71 (39.7)               | 0.101   |
| Beta-blockers, N (%)                | 964 (48.1)          | 92 (51.4)               | 0.435   |
| Diuretics, N (%)                    | 755 (37.7)          | 69 (38.5)               | 0.810   |
| Nitrates, N (%)                     | 518 (25.8)          | 57 (31.8)               | 0.092   |
| Statins and fibrates, N (%)         | 621 (31.0)          | 51 (28.5)               | 0.554   |

|                       |            |           |       |
|-----------------------|------------|-----------|-------|
| Anticoagulants, N (%) | 320 (16.0) | 33 (18.4) | 0.397 |
| Antiplatelets, N (%)  | 798 (39.8) | 74 (41.3) | 0.691 |

1 ACEI, angiotensin-converting-enzyme inhibitors. ARB, angiotensin II receptor blockers.

2 fQRS, fragmented QRS.

3

4

**Table 2.** Cox regression analysis of all 2182 patients. Hazard ratios were referenced against patients without fragmented QRS.

| Outcome                                |              | Univariate           |         | Multivariate model 1 <sup>1</sup> |         | Multivariate model 2 <sup>2</sup> |         |
|----------------------------------------|--------------|----------------------|---------|-----------------------------------|---------|-----------------------------------|---------|
|                                        |              | HR [95% CI)          | p value | HR [95% CI)                       | p value | HR [95% CI)                       | p value |
| Composite primary outcome <sup>3</sup> |              | 1.507 [1.160, 1.959] | 0.002   | 1.541 [1.185, 2.004]              | 0.001   | 1.474 [1.132, 1.920]              | 0.004   |
| Secondary outcomes                     | CV mortality | 1.373 [1.008, 1.871] | 0.044   | 1.434 [1.051, 1.955]              | 0.023   | 1.425 [1.044, 1.943]              | 0.026   |
|                                        | VA           | 3.231 [1.707, 6.119] | 0.0003  | 2.918 [1.540, 5.527]              | 0.001   | 2.278 [1.191, 4.358]              | 0.013   |
|                                        | SCD          | 1.832 [1.231, 2.727] | 0.003   | 1.833 [1.230, 2.730]              | 0.003   | 1.710 [1.145, 2.554]              | 0.009   |
|                                        | MI           | 1.023 [0.700, 1.496] | 0.905   | 1.014 [0.693, 1.484]              | 0.942   | 1.008 [0.689, 1.476]              | 0.967   |
|                                        | New-onset AF | 1.111 [0.874, 1.413] | 0.391   | 1.123 [0.883, 1.429]              | 0.343   | 1.132 [0.887, 1.437]              | 0.312   |

<sup>1</sup> Adjusted for sex and renal disease

<sup>2</sup> Adjusted for prior history of ventricular arrhythmia, sex, and renal disease

<sup>3</sup> A composite of cardiovascular mortality, ventricular arrhythmia, and sudden cardiac death

AF, atrial fibrillation. CI, confidence interval. CV, cardiovascular. HR, hazard ratio. MI, myocardial infarction. SCD, sudden cardiac death. VA, ventricular arrhythmia.

## Figures

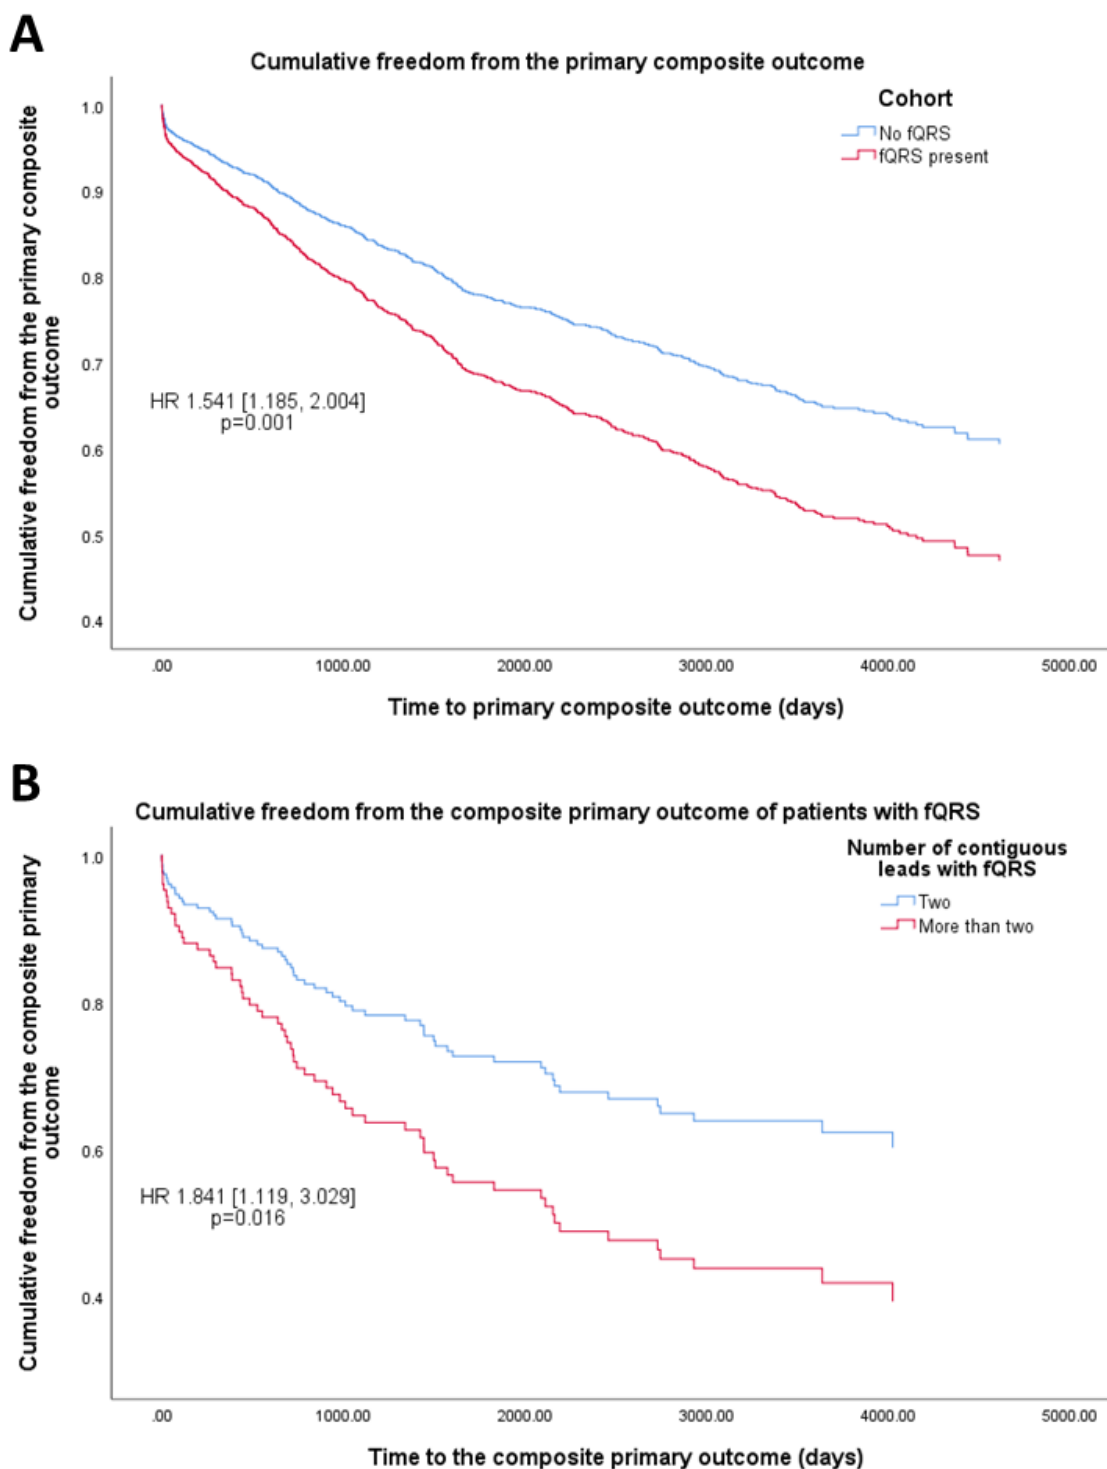

Figure 1. Kaplan-Meier curves of cumulative freedom from the primary composite outcome of (A) all patients, and (B) patients with fragmented QRS (fQRS). The hazard ratios (HR) shown were adjusted for differences in baseline characteristics.
