1 **Fragmented QRS is independently predictive of long-term adverse clinical**  
2 **outcomes in Asian patients hospitalized for heart failure: a retrospective**  
3 **cohort study**

4 Running head: Fragmented QRS in heart failure

5 Jeffrey Shi Kai Chan<sup>1\*</sup>, Jiandong Zhou<sup>1,2</sup>, Sharen Lee<sup>1</sup>, Andrew Li<sup>1,3</sup>, Martin Tan<sup>4</sup>, Keith S K  
6 Leung<sup>1,5</sup>, Kamalan Jeevaratnam<sup>6</sup>, Tong Liu<sup>7</sup>, Leonardo Roever<sup>8</sup>, Ying Liu<sup>9</sup>, Gary Tse<sup>1,6,7,10\*</sup>,  
7 Qingpeng Zhang<sup>2\*</sup>

8  
9 <sup>1</sup> Cardiovascular Analytics Group, Laboratory of Cardiovascular Physiology, Hong Kong,  
10 China

11 <sup>2</sup> School of Data Science, City University of Hong Kong, Hong Kong, China

12 <sup>3</sup> Faculty of Science, University of Calgary, Calgary, Canada

13 <sup>4</sup> University of Toronto, Toronto, Canada

14 <sup>5</sup> Emergency Medicine Unit, Li Ka Shing Faculty of Medicine, The University of Hong  
15 Kong, Hong Kong, China

16 <sup>6</sup> Faculty of Health and Medical Sciences, University of Surrey, Guildford, United Kingdom

17 <sup>7</sup> Tianjin Key Laboratory of Ionic-Molecular Function of Cardiovascular Disease,  
18 Department of Cardiology, Tianjin Institute of Cardiology, Second Hospital of Tianjin  
19 Medical University, Tianjin 300211, China

20 <sup>8</sup> Departamento de Pesquisa Clinica, Universidade Federal de Uberlandia, Uberlandia, MG,  
21 Brazil

22 <sup>9</sup> Heart Failure and Structural Cardiology Division, The First Affiliated Hospital of Dalian  
23 Medical University, Dalian, Liaoning Province, 116021, China

24 <sup>10</sup> Kent and Medway Medical School, Canterbury, United Kingdom

25

26 \* These authors share senior authorship; correspondence to:

27 Dr Gary Tse PhD FRCP

28 Tianjin Key Laboratory of Ionic-Molecular Function of Cardiovascular Disease, Department  
29 of Cardiology, Tianjin Institute of Cardiology, Second Hospital of Tianjin Medical  
30 University, Tianjin 300211, China

31 Faculty of Health and Medical Sciences, University of Surrey, GU2 7AL, Guildford, United  
32 Kingdom

33 Kent and Medway Medical School, Canterbury, United Kingdom

34 Email: [gary.tse@kmms.ac.uk](mailto:gary.tse@kmms.ac.uk)

NOTE: This preprint reports new research that has not been certified by peer review and should not be used to guide clinical practice.

1 Prof Qingpeng Zhang PhD  
2 School of Data Science, City University of Hong Kong, Hong Kong, China  
3 qingpeng.zhang@cityu.edu.hk

4

5 Dr Jeffrey Shi Kai Chan MBChB  
6 Cardiovascular Analytics Group, Laboratory of Cardiovascular Physiology, Hong Kong,  
7 China  
8 jeffreychan.dbs@gmail.com

9

10 **Keywords:** fragmented QRS; heart failure; Asian; ventricular arrhythmia; sudden cardiac  
11 death; myocardial fibrosis

12

13 **Word Count:** 1772

14

## 1 **Abstract**

2 *Background:* Fragmented QRS (fQRS) results from myocardial scarring and predicts  
3 cardiovascular mortality and ventricular arrhythmia (VA). We evaluated the prevalence and  
4 prognostic value of fQRS in Asian patients hospitalized for heart failure.

5 *Methods and results:* This was a retrospective cohort study of adult patients hospitalized for  
6 heart failure between 1<sup>st</sup> January 2010 and 31<sup>st</sup> December 2016 at a tertiary center in Hong  
7 Kong. The baseline ECG was analysed. QRS complexes (<120 ms) with fragmented  
8 morphology in  $\geq 2$  contiguous leads were defined as fQRS. The primary outcome was a  
9 composite of cardiovascular mortality, VA, and sudden cardiac death (SCD). The secondary  
10 outcomes were the components of the primary outcome, myocardial infarction, and new-  
11 onset atrial fibrillation. In total, 2192 patients were included, of whom 179 (8.20%) exhibited  
12 fQRS. The follow-up duration was  $5.63 \pm 4.09$  years. fQRS in any leads was associated with a  
13 higher risk of the primary outcome (adjusted hazard ratio (HR) 1.541 [1.185, 2.004],  
14  $p=0.001$ ), but not myocardial infarction or new-onset atrial fibrillation. fQRS in  $>2$   
15 contiguous leads was an independent predictor of SCD (HR 2.679 [1.252, 5.729],  $p=0.011$ ).  
16 In patients without ischaemic heart disease (N=1396), fQRS in any leads remained predictive  
17 of VA and SCD (adjusted HR 3.336 [1.343, 8.282],  $p=0.009$ , and 1.928 [1.135, 3.278],  
18  $p=0.015$ , respectively), but not cardiovascular mortality (adjusted HR 1.049 [0.662, 1.662],  
19  $p=0.839$ ).

20 *Conclusion:* fQRS is an independent predictor of cardiovascular mortality, VA, and SCD.  
21 Higher fQRS burden increased SCD risk. The implications of fQRS in heart failure patients  
22 without ischaemic heart disease require further studies.

23

## 1 **1. Introduction**

2 First described by Boineau and Cox in 1973, fragmented QRS (fQRS) is the manifestation of  
3 myocardial scarring on 12-lead surface electrocardiogram (ECG).(1,2) Though initially  
4 described in the context of ischaemic heart disease (IHD), fQRS has been observed in other  
5 conditions where myocardial scarring or fibrosis is present, such as hypertrophic  
6 cardiomyopathy and cardiac sarcoidosis.(2,3) The presence of fQRS has been shown to be  
7 predictive of mortality and ventricular arrhythmia (VA),(4) and several morphological  
8 criteria and classification systems have been set forth by a number of research groups.(2,5)  
9 While fQRS has been shown to be predictive of adverse cardiovascular outcomes in patients  
10 with heart failure,(4) most studies have focused on either acute outcomes of hospitalized  
11 patients, or long-term outcomes of ambulatory patients.(6,7) With the rising prevalence of  
12 heart failure in Asia,(8,9) there is an ever greater need for good prognostic markers in Asian  
13 patients with heart failure. As data on the prevalence and long-term prognostic power of  
14 fQRS in Asian patients hospitalized with heart failure are lacking, we aimed to bridge this  
15 gap in evidence with the current study.

16

## 17 **2. Materials and methods**

18 This was a retrospective cohort study approved by The Joint Chinese University of Hong  
19 Kong - New Territories East Cluster Clinical Research Ethics Committee. All patients aged  
20 18 years old or above who were hospitalized for heart failure between 1<sup>st</sup> January 2010 and  
21 31<sup>st</sup> December 2016 at a single tertiary center in Hong Kong were included. Patients who had  
22 wide QRS ( $\geq 120$  ms), missing primary outcome data, and those who did not have any ECG  
23 done during the index hospitalization were excluded. The patients were identified using the  
24 Clinical Data Analysis and Reporting System (CDARS), a territory-wide database that

1 centralizes patient information from local hospitals and ambulatory and outpatient facilities.  
2 Mortality data were obtained from the Hong Kong Death Registry, a government registry  
3 with the registered death records of all Hong Kong citizens linked to CDARS.

4

5 Patient demographics, prior comorbidities, and baseline medication usage were extracted.  
6 The baseline ECG obtained on the first heart failure admission was selected for analysis. We  
7 defined fQRS using the criteria set forth by Das et al, where fQRS was defined as the  
8 presence of an additional R wave (R'), notching in the nadir of the S wave, or presence of  
9 more than two R' waves in at least two contiguous leads within any myocardial territory  
10 (anterior, inferior, or lateral) with QRS duration of <120 ms.(5) QRS complexes with  
11 fragmented morphology in a single lead were not classified as fQRS. The primary outcome  
12 was a composite of cardiovascular mortality, VA, and SCD. The secondary outcomes were  
13 the individual components of the primary composite outcome, myocardial infarction (MI),  
14 and new-onset atrial fibrillation (AF). All patients were followed up till 31<sup>st</sup> December 2019.

15

16 All continuous variables were expressed as mean  $\pm$  standard deviation and compared using  
17 Student's t test. Dichotomous variables were compared using Fisher's exact test. All  
18 outcomes were analyzed by univariate and multivariate Cox regression adjusting for baseline  
19 comorbidities that were significantly different between cohorts; hazard ratios (HR) were used  
20 as the summary statistic. Subgroup analyses were done to assess the prognostic power of  
21 fQRS in patients with and without ischaemic heart disease respectively, as well as the impact  
22 of fQRS burden in patients with fQRS. All p values were two-sided, and  $p < 0.05$  was  
23 considered significant. All statistical analyses were performed using SPSS software version  
24 25.0 (IBM Corp, New York, USA). The raw data supporting the conclusions of this article

1 will be made available on reasonable request to any of the corresponding authors, without  
2 undue reservation.

3

### 4 **3. Results**

5 In total, 2868 patients fulfilled the inclusion criteria. After excluding patients with missing  
6 ECG (N=2), missing primary outcome data (N=309), and wide QRS complex (N=373), 2182  
7 patients were included in the analysis. We identified fQRS in 179 patients (8.20%), more of  
8 whom were males than those without fQRS (54.7% vs 46.6%,  $p=0.042$ ), but were not  
9 significantly different in age ( $75.4\pm 14.8$  years vs  $74.4\pm 13.5$  years,  $p=0.403$ ). Patients with  
10 fQRS had significantly higher rates of renal diseases ( $p=0.011$ ). Other baseline characteristics  
11 were not significantly different between the two cohorts (Table 1). Follow-up durations were  
12 similar ( $5.53\pm 4.21$  years vs  $5.64\pm 4.08$  years,  $p=0.733$ ). The primary composite outcome was  
13 met in 566 (25.9%) patients, while the secondary outcome of cardiovascular mortality was  
14 met in 419 (19.2%) patients, VA in 56 (2.6%) patients, SCD in 212 (9.7%) patients, MI in  
15 353 (16.2%) patients, and new-onset AF in 829 (38.0%) patients.

16

#### 17 *3.1. Prognostic value of the presence of fQRS*

18 Cox regression (Table 2) showed that the presence of fQRS predicted the primary composite  
19 outcome in univariate analysis (HR 1.507 [1.160, 1.959],  $p=0.002$ ), which remained  
20 significant after adjustments for baseline differences (HR 1.541 [1.185, 2.004],  $p=0.001$ ;  
21 Figure 1). Both univariate and multivariate analyses demonstrated that fQRS was strongly  
22 predictive of cardiovascular mortality, VA, and SCD. However, there were no significant  
23 differences in the risks of MI and new-onset AF. To delineate the prognostic value of fQRS  
24 more clearly, we further adjusted the above multivariate analyses with clinical history of VA.

1 The statistical significance of all these observations remained stable after adjustment,  
2 showing that the prognostic value of fQRS was independent of clinical history of VA.

3

### 4 *3.2. Subgroup analysis by IHD status*

5 Subgroup analysis was performed on patients with (786 (36.0%)) and without (1396 (64.0%))  
6 IHD (Supplementary Table S1). fQRS was present in 75 (9.5%) patients with IHD, and 104  
7 (7.4%) patients without IHD. Patients with IHD were followed up for slightly longer periods  
8 ( $5.82\pm 4.13$  years vs  $5.29\pm 4.00$  years,  $p=0.003$ ). Among patients with IHD, the primary  
9 composite outcome was met in 228 (29.0%) patients, while the outcome of cardiovascular  
10 mortality was met in 171 (21.8%) patients, VA in 28 (3.6%) patients, SCD in 83 (10.6%)  
11 patients, MI in 204 (26.0%) patients, and new-onset AF in 249 (31.7%) patients. Among  
12 patients without IHD, these were met in 338 (24.2%), 248 (17.8%), 28 (2.0%), 129 (9.2%),  
13 149 (10.7%), and 580 (41.5%) patients, respectively. Cox regression showed that in patients  
14 with IHD, fQRS predicted the primary composite outcome (adjusted HR 1.746 [1.191,  
15 2.559],  $p=0.004$ ), cardiovascular mortality (adjusted HR 1.802 [1.173, 2.768],  $p=0.007$ ), VA  
16 (adjusted HR 2.652 [1.065, 6.602],  $p=0.036$ ), and SCD (adjusted HR 1.881 [1.014, 3.481],  
17  $p=0.045$ ). However, fQRS did not predict the primary composite outcome in patients without  
18 IHD (adjusted HR 1.342 [0.929, 1.938],  $p=0.117$ ), despite remaining strongly predictive of  
19 VA (adjusted HR 3.336 [1.343, 8.282],  $p=0.009$ ) and SCD (adjusted HR 1.928 [1.135,  
20 3.278],  $p=0.015$ ).

21

### 22 *3.3. Prognostic value of fQRS burden*

23 Patients with fQRS were stratified into those with two contiguous leads with fQRS (112  
24 patients; 5.13% of all patients; 62.6% of patients with fQRS), and those with more than two

1 such leads (67 patients; 3.07% of all patients; 37.4% of patients with fQRS), as summarized  
2 in Supplementary Table S2. The two subgroups were not significantly different in any  
3 baseline characteristics. Cox regression demonstrated significantly higher risk of the primary  
4 composite outcome in the latter (HR 1.841 [1.119, 3.029], p=0.016; Figure 2), driven by a  
5 significantly higher risk of SCD (HR 2.866 [1.350, 6.081], p=0.006) which remained  
6 significant even after adjustment for clinical history of VA and SCD (HR 2.679 [1.252,  
7 5.729], p=0.011). All other outcomes were not significantly different in risk between the two  
8 subgroups.

9

#### 10 **4. Discussion**

11 In this retrospective cohort study of heart failure patients, fQRS is strongly and independently  
12 predictive of cardiovascular mortality, VA and SCD, with the presence of fQRS in more than  
13 two contiguous leads being associated with significantly higher risk of SCD. Additionally, we  
14 showed that while fQRS was strongly predictive of VA and SCD regardless of IHD status,  
15 though fQRS was only predictive of cardiovascular mortality in patients with IHD.

16

17 Previous studies have shown that fQRS is predictive of mortality and arrhythmic events in  
18 patients with heart failure.(4) To the authors' best knowledge, the present study is the first  
19 study focusing on Asian patients hospitalized with heart failure that reported long-term  
20 clinical outcomes, with a mean follow-up duration exceeding five years. We confirmed that  
21 the elevated risk of adverse outcomes in patients with fQRS persists in the long term,  
22 independent of prior history of VA. The magnitudes of elevated risk we observed were also  
23 comparable to previous studies.(4) Previous studies on Asian patients with heart failure have  
24 found fQRS in 16.6-49% of patients.(6,10,11) In contrast, we identified fQRS in 8.20% of



1 included patients. This difference in prevalence was probably due to the less-selective  
2 inclusion and exclusion criteria we used. Having identified all patients through a territory-  
3 wide database, the results of our study more closely reflect real life practice, and better guide  
4 clinicians in their care of patients with heart failure.

5  
6 Additionally, we found that a higher burden of fQRS was associated with further increased  
7 risk of SCD. A similar concept has been shown by Debonnaire et al in patients with  
8 hypertrophic cardiomyopathy.(12) This finding may be explained mechanistically by higher  
9 fQRS burden reflecting more extensive myocardial scarring.(13) By choosing a cutoff of two  
10 contiguous leads with fQRS, our results meant that the presence of additional leads with QRS  
11 complexes of fragmented morphology beyond the classification criteria would be additionally  
12 predictive of SCD. This allowed for a straightforward and intuitive interpretation, potentially  
13 facilitating clinical applications.

14  
15 Importantly and interestingly, we showed that fQRS was predictive of SCD but not  
16 cardiovascular mortality in patients without IHD. It must be noted that non-ischaemic  
17 cardiomyopathies are a heterogeneous entity with various aetiologies, and the  
18 pathophysiological changes leading to the presence of fQRS might vary accordingly. It is  
19 thus possible that fQRS has varying significance in these patients depending on the aetiology  
20 of cardiomyopathy. Further studies are warranted in this area.

21  
22 *4.1. Limitations*

1 This study has several limitations. First, data obtained from CDARS could not be  
2 adjudicated. However, all data entry were done by clinicians who were not involved in this  
3 study. Second, without accompanying echocardiographic and aetiological data, the included  
4 patients with heart failure were heterogeneous in aetiology and phenotype. As shown by the  
5 subgroup analysis on patients with or without IHD, such differences may affect the  
6 prognostic value of fQRS. Third, our analysis did not account for differences in the  
7 morphologies of fQRS, which may have prognostic implications.(2)

8

## 9 **5. Conclusion**

10 The presence of fQRS was independently predictive of cardiovascular mortality, VA, and  
11 SCD in Asian patients hospitalized for heart failure. Having fQRS in more than two  
12 contiguous leads independently predicted further increased risk of SCD. However, fQRS did  
13 not predict cardiovascular mortality in patients without IHD, warranting further studies.

14

## 15 **6. Conflicts of interests**

16 The authors declare that the research was conducted in the absence of any commercial or  
17 financial relationships that could be construed as a potential conflict of interest.

18

## 19 **7. Funding**

20 None.

21

22

## 1 8. References

- 2 1. Boineau JP, Cox JL. Slow ventricular activation in acute myocardial infarction. A  
3 source of re entrant premature ventricular contractions. *Circulation* (1973) **48**:702–  
4 713. doi:10.1161/01.CIR.48.4.702
- 5 2. Haukilahti MAE, Eranti A, Kenttä T, Huikuri H V. QRS fragmentation patterns  
6 representing myocardial scar need to be separated from benign normal variants:  
7 Hypotheses and proposal for morphology based classification. *Front Physiol* (2016)  
8 **7**:653. doi:10.3389/fphys.2016.00653
- 9 3. Homsy M, Alsayed L, Safadi B, Mahenthiran J, Das MK. Fragmented QRS complexes  
10 on 12-lead ECG: A marker of cardiac sarcoidosis as detected by gadolinium cardiac  
11 magnetic resonance imaging. *Ann Noninvasive Electrocardiol* (2009) **14**:319–326.  
12 doi:10.1111/j.1542-474X.2009.00320.x
- 13 4. Kanitsoraphan C, Rattanawong P, Mekraksakit P, Chongsathidkiet P, Riangwiwat T,  
14 Kanjanahattakij N, Vutthikraivit W, Klomjit S, Thavaraputta S. Baseline fragmented  
15 QRS is associated with increased all-cause mortality in heart failure with reduced  
16 ejection fraction: A systematic review and meta-analysis. *Ann Noninvasive*  
17 *Electrocardiol* (2019) **24**: doi:10.1111/anec.12597
- 18 5. Das MK, Khan B, Jacob S, Kumar A, Mahenthiran J. Significance of a fragmented  
19 QRS complex versus a Q wave in patients with coronary artery disease. *Circulation*  
20 (2006) **113**:2495–2501. doi:10.1161/CIRCULATIONAHA.105.595892
- 21 6. Pei J, Li N, Gao Y, Wang Z, Li X, Zhang Y, Chen J, Zhang P, Cao K, Pu J. The J  
22 wave and fragmented QRS complexes in inferior leads associated with sudden cardiac  
23 death in patients with chronic heart failure. *Europace* (2012) **14**:1180–1187.  
24 doi:10.1093/europace/eur437

- 1 7. Younis AS, El-Halag MI, ElBadry MA, Abbas NIM. Fragmented QRS complex  
2 frequency and location as predictor of cardiogenic shock and mortality following acute  
3 coronary syndrome. *Egypt Hear J* (2020) **72**: doi:10.1186/s43044-020-00076-y
- 4 8. Rajadurai J, Tse HF, Wang CH, Yang NI, Zhou J, Sim D. Understanding the  
5 Epidemiology of Heart Failure to Improve Management Practices: An Asia-Pacific  
6 Perspective. *J Card Fail* (2017) **23**:327–339. doi:10.1016/j.cardfail.2017.01.004
- 7 9. Martinez-Amezcuca P, Haque W, Khera R, Kanaya AM, Sattar N, Lam CSP,  
8 Harikrishnan S, Shah SJ, Kandula NR, Jose PO, et al. The upcoming epidemic of heart  
9 failure in South Asia. *Circ Hear Fail* (2020)  
10 doi:10.1161/CIRCHEARTFAILURE.120.007218
- 11 10. Igarashi M, Tada H, Yamasaki H, Kuroki K, Ishizu T, Seo Y, Machino T, Murakoshi  
12 N, Sekiguchi Y, Noguchi Y, et al. Fragmented QRS Is a Novel Risk Factor for  
13 Ventricular Arrhythmic Events After Receiving Cardiac Resynchronization Therapy in  
14 Nonischemic Cardiomyopathy. *J Cardiovasc Electrophysiol* (2017) **28**:327–335.  
15 doi:10.1111/jce.13139
- 16 11. Sha J, Zhang S, Tang M, Chen K, Zhao X, Wang F. Fragmented QRS is associated  
17 with all-cause mortality and ventricular arrhythmias in patient with idiopathic dilated  
18 cardiomyopathy. *Ann Noninvasive Electrocardiol* (2011) **16**:270–275.  
19 doi:10.1111/j.1542-474X.2011.00442.x
- 20 12. Debonnaire P, Katsanos S, Joyce E, Van Den Brink OVW, Atsma DE, Schalij MJ, Bax  
21 JJ, Delgado V, Marsan NA. QRS fragmentation and QTc duration relate to malignant  
22 ventricular tachyarrhythmias and sudden cardiac death in patients with hypertrophic  
23 cardiomyopathy. *J Cardiovasc Electrophysiol* (2015) **26**:547–555.  
24 doi:10.1111/jce.12629

- 1 13. Konno T, Hayashi K, Fujino N, Oka R, Nomura A, Nagata Y, Hodatsu A, Sakata K,  
2 Furusho H, Takamura M, et al. Electrocardiographic QRS Fragmentation as a Marker  
3 for Myocardial Fibrosis in Hypertrophic Cardiomyopathy. *J Cardiovasc*  
4 *Electrophysiol* (2015) **26**:1081–1087. doi:10.1111/jce.12742

5

6

## 1 **9. Figure and Table Legend**

2 Figure 1. Kaplan-Meier curves of cumulative freedom from the primary composite outcome  
3 of all patients, stratified by the presence of fragmented QRS (fQRS). The hazard ratio (HR)  
4 shown was adjusted for differences in baseline characteristics.

5 Figure 2. Kaplan-Meier curves of cumulative freedom from the primary composite outcome  
6 of patients with fragmented QRS (fQRS), stratified by fQRS burden. The hazard ratio (HR)  
7 shown was adjusted for differences in baseline characteristics.

8 Table 1. Baseline characteristics and follow-up durations of included patients.

9 Table 2. Cox regression analysis of all 2182 patients. Hazard ratios were referenced against  
10 patients without fragmented QRS.

11

## 12 **10. Supplementary materials**

13 Supplementary Table S1. Cox regression results, stratified by the presence of ischaemic heart  
14 disease. Hazard ratios (HR) were referenced against patients without fragmented QRS.

15 Supplementary Table S2. Cox regression of the 179 patients with fragmented QRS. Hazard  
16 ratios were referenced against patients with fragmented QRS present in only two contiguous  
17 leads.

18

1 **Table 1.** Baseline characteristics and follow-up durations of included patients.

|                                     | No fQRS<br>(N=2003) | fQRS present<br>(N=179) | p value |
|-------------------------------------|---------------------|-------------------------|---------|
| Follow-up duration, years           | 5.64±4.08           | 5.53±4.21               | 0.733   |
| <i>Demographics</i>                 |                     |                         |         |
| Male, N (%)                         | 934 (46.6)          | 98 (54.7)               | 0.042   |
| Age, years                          | 74.4±13.5           | 75.4±14.8               | 0.403   |
| <i>Comorbidities</i>                |                     |                         |         |
| Diabetes mellitus, N (%)            | 616 (30.8)          | 50 (27.9)               | 0.447   |
| Renal diseases, N (%)               | 277 (13.8)          | 13 (7.26)               | 0.011   |
| Hypertension, N (%)                 | 918 (45.8)          | 69 (38.5)               | 0.071   |
| Ischaemic heart disease, N (%)      | 711 (35.5)          | 75 (41.9)               | 0.089   |
| Myocardial infarction, N (%)        | 185 (9.2)           | 19 (10.6)               | 0.505   |
| Prior ventricular arrhythmia, N (%) | 21 (1.0)            | 5 (2.8)                 | 0.056   |
| Prior sudden cardiac death, N (%)   | 22 (1.1)            | 4 (2.2)                 | 0.159   |
| Atrial fibrillation, N (%)          | 370 (18.5)          | 41 (22.9)               | 0.162   |
| Stroke / TIA, N (%)                 | 264 (13.2)          | 18 (10.1)               | 0.294   |
| <i>Medications</i>                  |                     |                         |         |
| ACEI / ARB, N (%)                   | 1016 (50.7)         | 95 (53.1)               | 0.585   |
| Calcium channel blockers, N (%)     | 923 (46.1)          | 71 (39.7)               | 0.101   |
| Beta-blockers, N (%)                | 964 (48.1)          | 92 (51.4)               | 0.435   |
| Diuretics, N (%)                    | 755 (37.7)          | 69 (38.5)               | 0.810   |
| Nitrates, N (%)                     | 518 (25.8)          | 57 (31.8)               | 0.092   |
| Statins and fibrates, N (%)         | 621 (31.0)          | 51 (28.5)               | 0.554   |

|                       |            |           |       |
|-----------------------|------------|-----------|-------|
| Anticoagulants, N (%) | 320 (16.0) | 33 (18.4) | 0.397 |
| Antiplatelets, N (%)  | 798 (39.8) | 74 (41.3) | 0.691 |

1 ACEI, angiotensin-converting-enzyme inhibitors. ARB, angiotensin II receptor blockers.

2 fQRS, fragmented QRS.

3

4



**Table 2.** Cox regression analysis of all 2182 patients. Hazard ratios were referenced against patients without fragmented QRS.

| Outcome                                |              | Univariate           |         | Multivariate model 1 <sup>1</sup> |         | Multivariate model 2 <sup>2</sup> |         |
|----------------------------------------|--------------|----------------------|---------|-----------------------------------|---------|-----------------------------------|---------|
|                                        |              | HR [95% CI)          | p value | HR [95% CI)                       | p value | HR [95% CI)                       | p value |
| Composite primary outcome <sup>3</sup> |              | 1.507 [1.160, 1.959] | 0.002   | 1.541 [1.185, 2.004]              | 0.001   | 1.474 [1.132, 1.920]              | 0.004   |
| Secondary outcomes                     | CV mortality | 1.373 [1.008, 1.871] | 0.044   | 1.434 [1.051, 1.955]              | 0.023   | 1.425 [1.044, 1.943]              | 0.026   |
|                                        | VA           | 3.231 [1.707, 6.119] | 0.0003  | 2.918 [1.540, 5.527]              | 0.001   | 2.278 [1.191, 4.358]              | 0.013   |
|                                        | SCD          | 1.832 [1.231, 2.727] | 0.003   | 1.833 [1.230, 2.730]              | 0.003   | 1.710 [1.145, 2.554]              | 0.009   |
|                                        | MI           | 1.023 [0.700, 1.496] | 0.905   | 1.014 [0.693, 1.484]              | 0.942   | 1.008 [0.689, 1.476]              | 0.967   |
|                                        | New-onset AF | 1.111 [0.874, 1.413] | 0.391   | 1.123 [0.883, 1.429]              | 0.343   | 1.132 [0.887, 1.437]              | 0.312   |

<sup>1</sup> Adjusted for sex and renal disease

<sup>2</sup> Adjusted for prior history of ventricular arrhythmia, sex, and renal disease

<sup>3</sup> A composite of cardiovascular mortality, ventricular arrhythmia, and sudden cardiac death

AF, atrial fibrillation. CI, confidence interval. CV, cardiovascular. HR, hazard ratio. MI, myocardial infarction. SCD, sudden cardiac death. VA, ventricular arrhythmia.

Cumulative freedom from the primary composite outcome

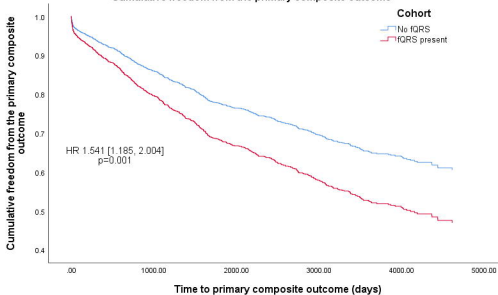

Cumulative freedom from the composite primary outcome of patients with fQRS

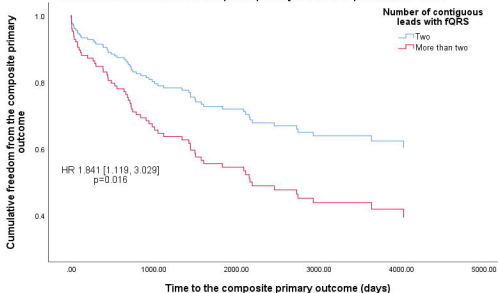

Source: https://medrxiv.org/content/medrxiv/early/2021/07/27/2021.07.01.21259847.full.pdf
